# Supplementary material
Source: Springer Nature journal article supplement (https://www.springermedizin.de/resource/supplementary/12884_2013_1001_MOESM7_ESM.pdf/9458742)
Supplement: MOESM7 [file 9458742]

**Table 4.** Single birth 37-42 weeks of pregnancy (wp). C-section and instrumental vaginal birth association with maternal age, type of financing and volume-stratum

|                                   | <u>Maternal age</u> |                 |                | <u>Type of financing</u> |                 |                | <u>Volume-stratum</u> |                 |                |
|-----------------------------------|---------------------|-----------------|----------------|--------------------------|-----------------|----------------|-----------------------|-----------------|----------------|
|                                   | <u>OR</u>           | <u>CI (95%)</u> | <u>p value</u> | <u>OR</u>                | <u>CI (95%)</u> | <u>p value</u> | <u>OR</u>             | <u>CI (95%)</u> | <u>p value</u> |
| <u>Caesarean section</u>          | 1.043               | 1.039-1.047     | 0.000          | 2,014                    | 1.940-2.090     | 0.000          | 0.976                 | 0.957-0.995     | 0.015          |
| <u>Instrumental vaginal birth</u> | 0.98                | 0.976-0.984     | 0.000          | 1,442                    | 1.377-1.510     | 0.000          | 1.016                 | 0.992-1.040     | 0.198          |
